# Supplementary material for: Temperature-dependent dynamics of water in aqueous NaPF6 solution
Source: Royal Society of Chemistry journal article supplement (doi:10.1039/c4cp02823f), 2014-01-01
Supplement: c4cp02823f1.pdf [file c4cp02823f1.pdf]

**Electronic Supplementary Information for**  
**Temperature-Dependent Dynamics of Water in Aqueous NaPF<sub>6</sub>**  
**Solution**

**Dayoung Nam,<sup>1</sup> Chiho Lee,<sup>1</sup> and Sungnam Park<sup>1,2\*</sup>**

<sup>1</sup>Department of Chemistry, Korea University, Seoul 136-713, Korea.

<sup>2</sup>Multidimensional Spectroscopy Laboratory, Korea Basic Science Institute, Seoul 136-713,  
Korea.

\*Authors to whom correspondence should be addressed.  
Email addresses: spark8@korea.ac.kr

### Decomposition of FTIR spectra into three contributions (OD<sub>w</sub>, OD<sub>c</sub>, and OD<sub>A</sub>)

$$\begin{aligned} S(\omega) &= \alpha \cdot S_{\text{OD}_w}(\omega) + S_{\text{OD}_c}(\omega) + S_{\text{OD}_A}(\omega) \\ &= \alpha \cdot S_{\text{OD}_w}(\omega) \\ &\quad + A_1 \left\{ m_1 \frac{2}{\pi} \frac{w_1}{4(\omega - \omega_1)^2 - w_1^2} + (1 - m_1) \sqrt{\frac{4 \log 2}{\pi}} \frac{1}{w_1} \exp \left[ -4 \log 2 \frac{(\omega - \omega_1)^2}{w_1^2} \right] \right\} \\ &\quad + A_2 \left\{ m_2 \frac{2}{\pi} \frac{w_2}{4(\omega - \omega_2)^2 - w_2^2} + (1 - m_2) \sqrt{\frac{4 \log 2}{\pi}} \frac{1}{w_2} \exp \left[ -4 \log 2 \frac{(\omega - \omega_2)^2}{w_2^2} \right] \right\} \end{aligned}$$

where  $\alpha$  is the scaling factor for the OD stretch band of neat water (OD<sub>w</sub>). The second and third terms are the pseudo Voigt profiles to fit the OD<sub>c</sub> and OD<sub>A</sub> peaks, respectively. The results of decomposition of FTIR spectra into three contributions are shown in Figures S1.

**Figure S1.**

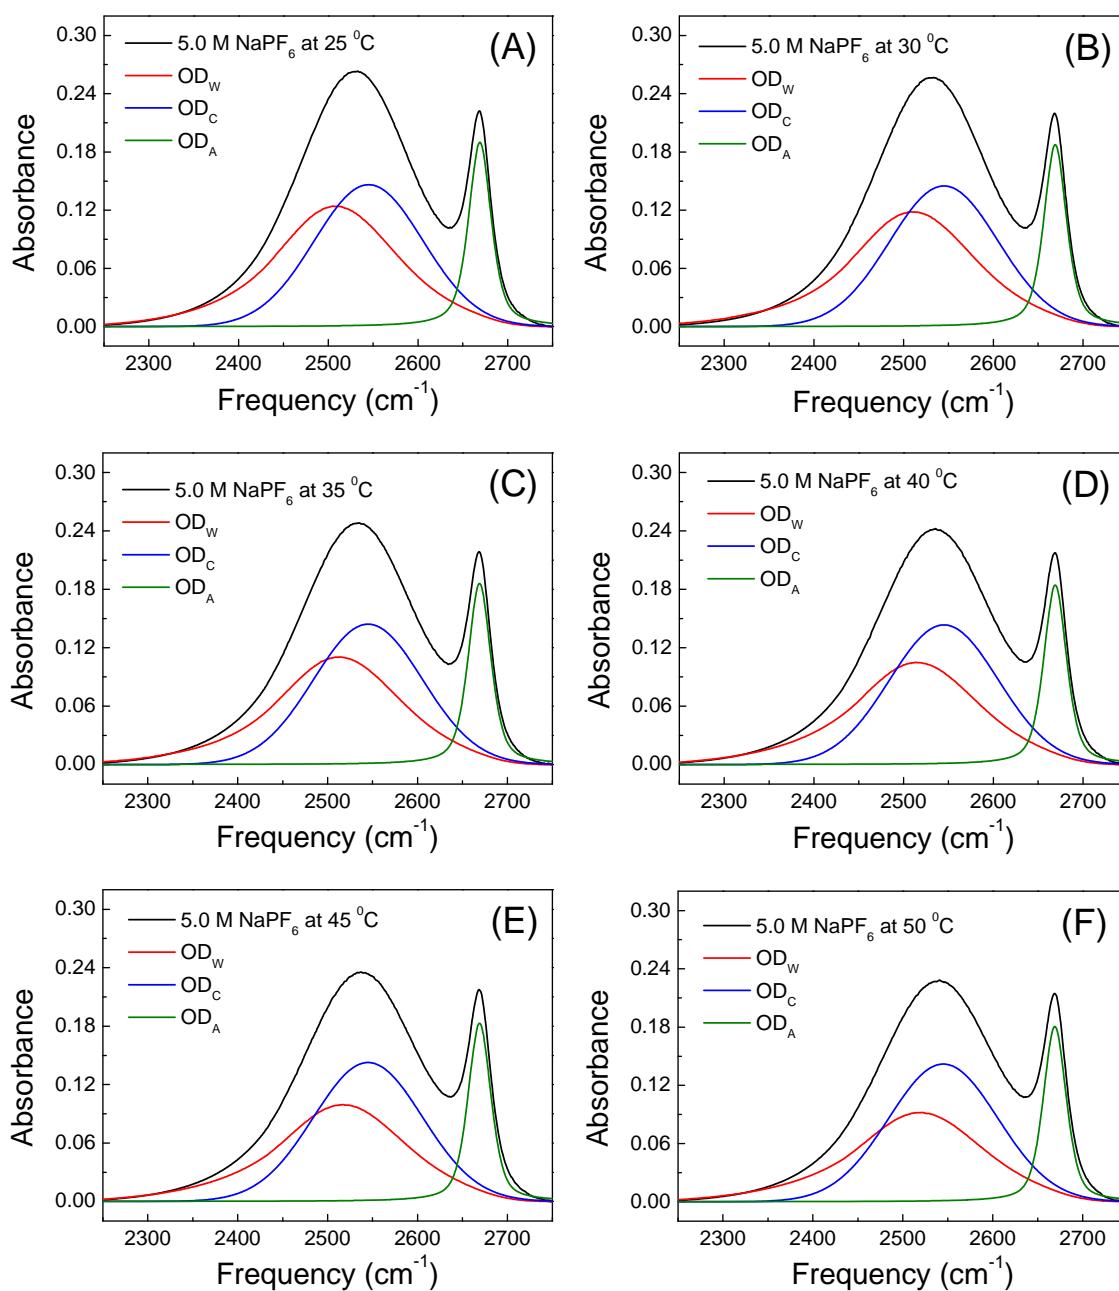

**Figure S1.** Decomposition of temperature-dependent FTIR spectra of aqueous 5.0 M NaPF<sub>6</sub> solution into three contributions (OD<sub>W</sub>, OD<sub>C</sub>, and OD<sub>A</sub>).
